# Supplementary material for: Mixed-method evaluation of CARITAS: a hospital-to-community model of integrated care for dementia
Source: PubMed Central journal article supplement — BMJ Open. 2020 Oct 5;10(10):e039017. doi: 10.1136/bmjopen-2020-039017 (PMC7537438; doi:10.1136/bmjopen-2020-039017), 2020-10-05
Supplement: bmjopen-2020-039017supp001.pdf [file bmjopen-2020-039017supp001.pdf]

**Appendix 1. Ethnographic Observation Template**

|                                                                                                                                                                            |                                                                |                       |
|----------------------------------------------------------------------------------------------------------------------------------------------------------------------------|----------------------------------------------------------------|-----------------------|
| <b>Participant ID:</b>                                                                                                                                                     | <b>Observer:</b>                                               | <b>Visit type:</b>    |
| <b>Program enrolled:</b>                                                                                                                                                   | <b>Date of observation:</b>                                    | <b>Setting:</b>       |
| <b>Team member:</b>                                                                                                                                                        | <b>Observation start time:</b><br><b>Observation end time:</b> | <b>In attendance:</b> |
| <b>Delivery of Information</b>                                                                                                                                             |                                                                |                       |
| What are the activities carried out?                                                                                                                                       |                                                                |                       |
| <b>Interactions between healthcare providers and clients (patients and (or) caregivers)</b>                                                                                |                                                                |                       |
| Healthcare provider's effort to build rapport (observed relationships between providers and clients):                                                                      |                                                                |                       |
| Healthcare provider's effort to engage clients (involvement of clients in their health and social conditions):                                                             |                                                                |                       |
| Healthcare provider's effort to empower clients (E.g. providing relevant information and skills to improve clients' self-efficacy and ability to make informed decisions): |                                                                |                       |
| Clients' responsiveness (Clients' responses and extent of engagement to healthcare providers and intervention):                                                            |                                                                |                       |
| Other Notes:                                                                                                                                                               |                                                                |                       |

## Appendix 2. Outline of an Interview Guide with Key Stakeholders in CARITAS

| Topic                                     | Questions                                                                                                                                                                                                                                                                                                                                                                                                             |
|-------------------------------------------|-----------------------------------------------------------------------------------------------------------------------------------------------------------------------------------------------------------------------------------------------------------------------------------------------------------------------------------------------------------------------------------------------------------------------|
| <b>Introduction</b>                       | <ol style="list-style-type: none"> <li>1. How are you involved in the CARITAS network?</li> <li>2. How has your experience been working in the network?</li> </ol>                                                                                                                                                                                                                                                    |
| <b>Components of CARITAS</b>              | <ol style="list-style-type: none"> <li>1. Could you help me understand more about the various components of CARITAS? (e.g. weekly multi-disciplinary meeting, referral to community partners, outpatient follow-up, inpatient ward, polyclinics, etc)</li> <li>2. How do you follow up with patients? How do you design care plans?</li> <li>3. How is information exchanged? How is the network financed?</li> </ol> |
| <b>Experience of working together</b>     | <ol style="list-style-type: none"> <li>1. What do you think is the objective of the network?</li> <li>2. How do you work together to provide different aspects of care in the network?</li> <li>3. How has the partnership across organizations been like?</li> </ol>                                                                                                                                                 |
| <b>Experience of being in the network</b> | <ol style="list-style-type: none"> <li>1. What do you think are the factors that contributed to the success of the programme? What are your challenges?</li> <li>2. What are some aspects you felt have changed over the years? How did you adapt?</li> <li>3. How do you think patients and family members have benefitted from the network?</li> </ol>                                                              |
| <b>Evaluation</b>                         | <ol style="list-style-type: none"> <li>1. How can CARITAS be improved?</li> <li>2. How does CARITAS compare with other integrated care programmes you have worked with or are familiar with?</li> <li>3. Do you think that CARITAS should be scaled up or expanded?</li> </ol>                                                                                                                                        |
